# Supplementary material
Source: PubMed Central journal article supplement (PMC327190)

| Reactions                       | constants |
|---------------------------------|-----------|
| $a \rightarrow a+A$             | 0.092     |
| $A \rightarrow \text{Nothing}$  | 0.021     |
| $b \rightarrow b+B$             | 1.5       |
| $B \rightarrow \text{Nothing}$  | 0.11      |
| $a+A \rightarrow a:A$           | 0.50      |
| $a:A \rightarrow a+A$           | 0.56      |
| $a:A \rightarrow a:A+A$         | 0.38      |
| $a+B \rightarrow a:B$           | 0.59      |
| $a:B \rightarrow a+B$           | 0.082     |
| $a:B \rightarrow a:B+A$         | 0.0085    |
| $b+B \rightarrow b:B$           | 0.47      |
| $b:B \rightarrow b+B$           | 0.27      |
| $b:B \rightarrow b:B+B$         | 3.0       |
| $b:B+A \rightarrow b:B:A$       | 0.64      |
| $b:B:A \rightarrow b:B+A$       | 0.67      |
| $b:B:A \rightarrow b:B:A+B$     | 0.88      |
| $b:B:A+A \rightarrow b:B:A:A$   | 0.38      |
| $b:B:A:A \rightarrow b:B:A+A$   | 0.13      |
| $b:B:A:A \rightarrow b:B:A:A+B$ | 0.014     |

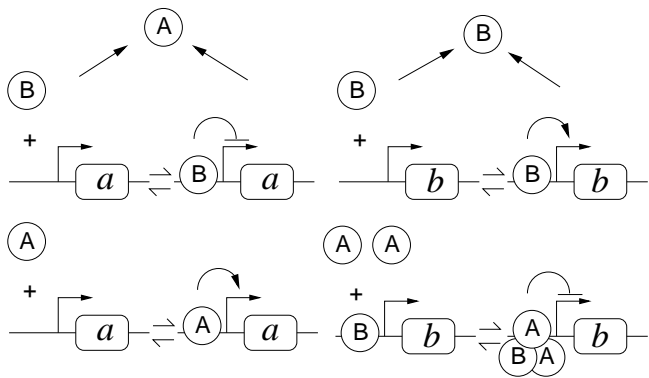

Supplement: pnas_0304532101_2.pdf [file pnas_0304532101_2.pdf]
