# Supplementary material
Source: PubMed Central journal article supplement (PMC327190)

| Reactions                      | Constants |
|--------------------------------|-----------|
| $a \rightarrow a+A$            | 0.13      |
| $A \rightarrow \text{Nothing}$ | 0.030     |
| $b \rightarrow b+B$            | 0.16      |
| $B \rightarrow \text{Nothing}$ | 0.080     |
| $a+A \rightarrow a:A$          | 1.4       |
| $a:A \rightarrow a+A$          | 0.65      |
| $a:A \rightarrow a:A+A$        | 0.70      |
| $a+B \rightarrow a:B$          | 0.89      |
| $a:B \rightarrow a+B$          | 0.076     |
| $a:B \rightarrow a:B+A$        | 0.033     |
| $b+B \rightarrow b:B$          | 0.19      |
| $b:B \rightarrow b+B$          | 0.30      |
| $b:B \rightarrow b:B+B$        | 2.6       |
| $b+A \rightarrow b:A$          | 0.95      |
| $b:A \rightarrow b+A$          | 0.26      |
| $b:A \rightarrow b:A+B$        | 0.0075    |

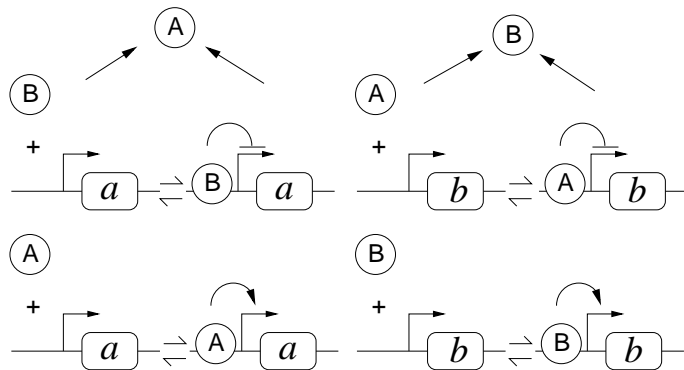

Supplement: pnas_0304532101_4.pdf [file pnas_0304532101_4.pdf]
