# Supplementary material
Source: PubMed Central journal article supplement (PMC327190)

| Reactions                        | Constants |
|----------------------------------|-----------|
| $a \rightarrow a+A$              | 0.52      |
| $A \rightarrow \text{Nothing}$   | 0.00019   |
| $b \rightarrow b+B$              | 0.79      |
| $B \rightarrow \text{Nothing}$   | 0.0030    |
| $A+B \rightarrow A:B$            | 0.053     |
| $A:B \rightarrow \text{Nothing}$ | 0.15      |
| $b+A \rightarrow b:A$            | 0.22      |
| $b:A \rightarrow b+A$            | 0.31      |
| $b:A \rightarrow b:A+B$          | 0.43      |

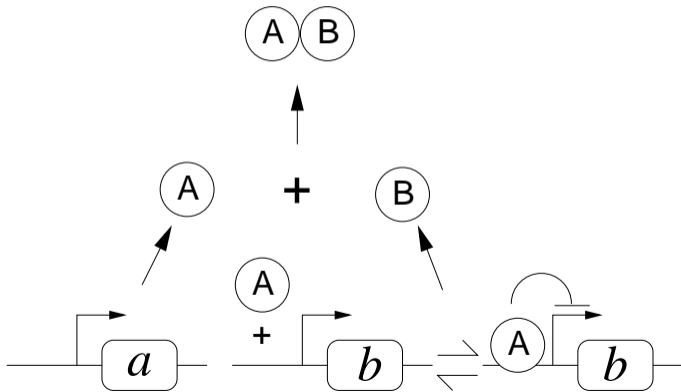

Supplement: pnas_0304532101_6.pdf [file pnas_0304532101_6.pdf]
