# Supplementary material
Source: PubMed Central journal article supplement (PMC327190)

| Reactions                        | Constants |
|----------------------------------|-----------|
| $a \rightarrow a+A$              | 0.39      |
| $A \rightarrow \text{Nothing}$   | 0.00039   |
| $b \rightarrow b+B$              | 0.26      |
| $B \rightarrow \text{Nothing}$   | 0.0033    |
| $A+B \rightarrow A:B$            | 0.015     |
| $A:B \rightarrow \text{Nothing}$ | 0.34      |
| $b+B \rightarrow b:B$            | 0.30      |
| $b:B \rightarrow b+B$            | 1.0       |
| $b:B \rightarrow b:B+B$          | 0.71      |

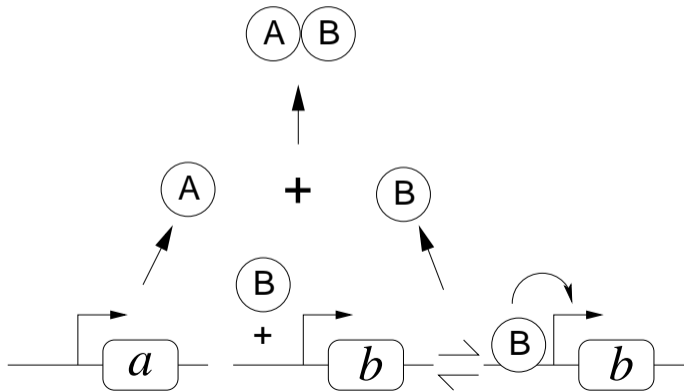

Supplement: pnas_0304532101_8.pdf [file pnas_0304532101_8.pdf]
