# Supplementary material
Source: PubMed Central journal article supplement (PMC327190)

| Reactions                        | constants |
|----------------------------------|-----------|
| $a \rightarrow a+A$              | 0.79      |
| $A \rightarrow \text{Nothing}$   | 0.046     |
| $b \rightarrow b+B$              | 0.070     |
| $B \rightarrow \text{Nothing}$   | 0.0039    |
| $A+B \rightarrow A:B$            | 0.28      |
| $A:B \rightarrow \text{Nothing}$ | 0.027     |
| $a+A \rightarrow a:A$            | 0.78      |
| $a:A \rightarrow a+A$            | 0.020     |
| $a:A \rightarrow a:A+A$          | 0.75      |
| $b+B \rightarrow b:B$            | 0.26      |
| $b:B \rightarrow b+B$            | 0.95      |
| $b:B \rightarrow b:B+B$          | 0.56      |
| $a:A+B \rightarrow a:A:B$        | 0.087     |
| $a:A:B \rightarrow a:A+B$        | 0.11      |
| $a:A:B \rightarrow a:A:B+A$      | 0.30      |

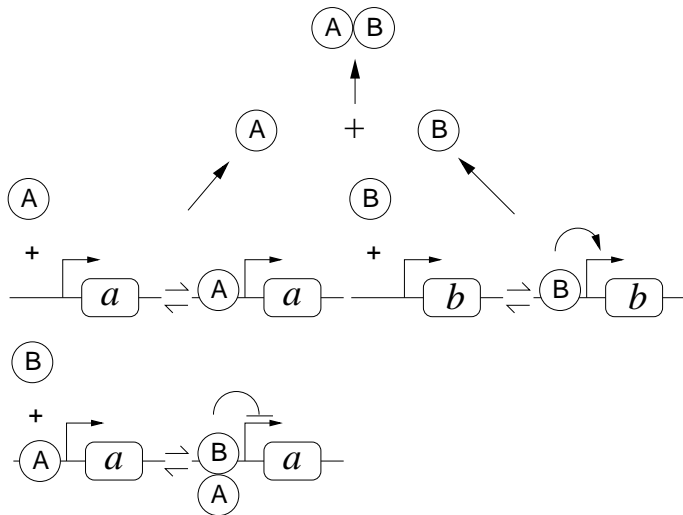

Supplement: pnas_0304532101_10.pdf [file pnas_0304532101_10.pdf]
