# Supplementary material
Source: PubMed Central journal article supplement (PMC327190)

| Reactions                      | Constants |
|--------------------------------|-----------|
| $a \rightarrow a+A$            | 0.17      |
| $A \rightarrow \text{Nothing}$ | 0.038     |
| $b \rightarrow b+B$            | 0.88      |
| $B \rightarrow \text{Nothing}$ | 0.060     |
| $c \rightarrow c+C$            | 0.42      |
| $C \rightarrow \text{Nothing}$ | 0.041     |
| $a+A \rightarrow a:A$          | 0.62      |
| $a:A \rightarrow a+A$          | 0.70      |
| $a:A \rightarrow a:A+A$        | 0.58      |
| $b+C \rightarrow b:C$          | 0.98      |
| $b:C \rightarrow b+C$          | 0.15      |
| $b:C \rightarrow b:C+B$        | 0.95      |
| $a:A+A \rightarrow a:A:A$      | 0.70      |
| $a:A:A \rightarrow a:A+A$      | 0.83      |
| $a:A:A \rightarrow a:A:A+A$    | 0.93      |
| $b:C+A \rightarrow b:C:A$      | 0.94      |
| $b:C:A \rightarrow b:C+A$      | 0.59      |
| $b:C:A \rightarrow b:C:A+B$    | 0.15      |
| $A+C \rightarrow A:C$          | 0.61      |

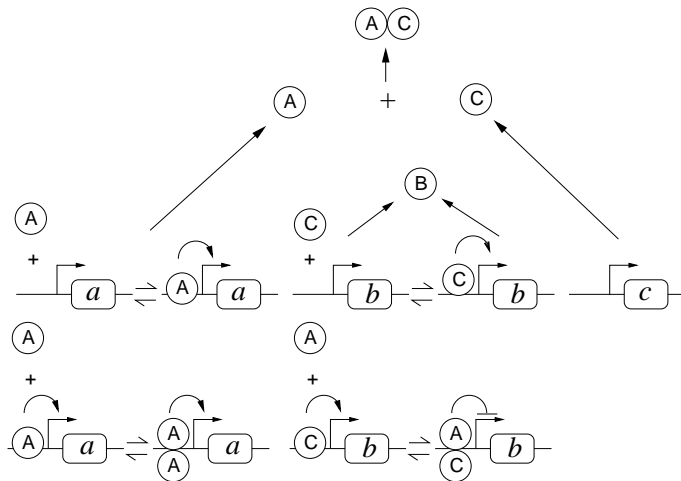

Supplement: pnas_0304532101_12.pdf [file pnas_0304532101_12.pdf]
