# Supplementary material
Source: PubMed Central journal article supplement (PMC327190)

| Reactions                       | Constants |
|---------------------------------|-----------|
| $a \rightarrow a+A$             | 0.0048    |
| $A \rightarrow \text{Nothing}$  | 0.0093    |
| $b \rightarrow b+B$             | 1.3       |
| $B \rightarrow \text{Nothing}$  | 0.058     |
| $c \rightarrow c+C$             | 0.75      |
| $C \rightarrow \text{Nothing}$  | 0.091     |
| $B+C \rightarrow B$             | 0.81      |
| $a+C \rightarrow a:C$           | 0.22      |
| $a:C \rightarrow a+C$           | 0.95      |
| $a:C \rightarrow a:C+A$         | 0.57      |
| $b+B \rightarrow b:B$           | 0.39      |
| $b:B \rightarrow b+B$           | 0.40      |
| $b:B \rightarrow b:B+B$         | 1.6       |
| $b+A \rightarrow b:A$           | 1.2       |
| $b:A \rightarrow b+A$           | 0.6       |
| $b:A \rightarrow b:A+B$         | 0.45      |
| $b:A+A \rightarrow b:A:A$       | 0.25      |
| $b:A:A \rightarrow b:A+A$       | 1.1       |
| $b:A:A \rightarrow b:A:A+B$     | 0.060     |
| $b:A:A+A \rightarrow b:A:A:A$   | 0.32      |
| $b:A:A:A \rightarrow b:A:A+A$   | 0.10      |
| $b:A:A:A \rightarrow b:A:A:A+B$ | 0.032     |

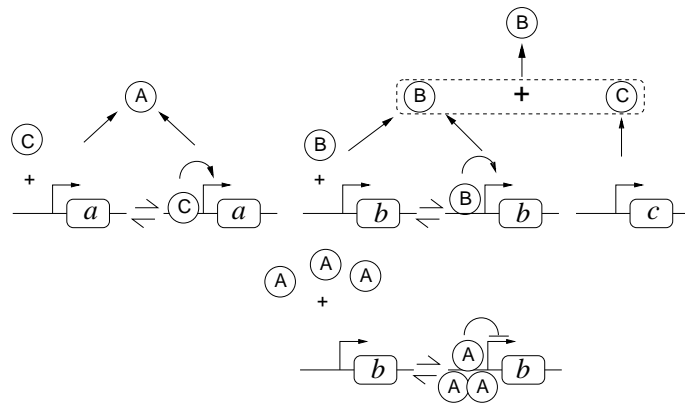

Supplement: pnas_0304532101_14.pdf [file pnas_0304532101_14.pdf]
