# Supplementary material
Source: PubMed Central journal article supplement (PMC327190)

| Reactions                             | Constants |
|---------------------------------------|-----------|
| $a \rightarrow a+A$                   | 0         |
| $A \rightarrow \text{Nothing}$        | 0.00019   |
| $b \rightarrow b+B$                   | 0.43      |
| $B \rightarrow \text{Nothing}$        | 0.077     |
| $c \rightarrow c+C$                   | 0.57      |
| $C \rightarrow \text{Nothing}$        | 0.023     |
| $A+B \rightarrow A:B$                 | 0.066     |
| $A:B \rightarrow \text{Nothing}$      | 0.057     |
| $C+C \rightarrow C:C$                 | 0.14      |
| $C:C \rightarrow \text{Nothing}$      | 0.0014    |
| $C:C + B \rightarrow C:C$             | 0.21      |
| $C:C + C:C \rightarrow C:C:C:C$       | 0.37      |
| $C:C:C:C \rightarrow \text{Nothing}$  | 0.24      |
| $C+A:B \rightarrow A:B$               | 1.5       |
| $a + C:C:C:C \rightarrow a:C:C:C:C$   | 0.5       |
| $a:C:C:C:C \rightarrow a + C:C:C:C$   | 0.33      |
| $a:C:C:C:C \rightarrow a:C:C:C:C + A$ | 0.56      |
| $A:B + C:C \rightarrow A:B:C:C$       | 0.74      |

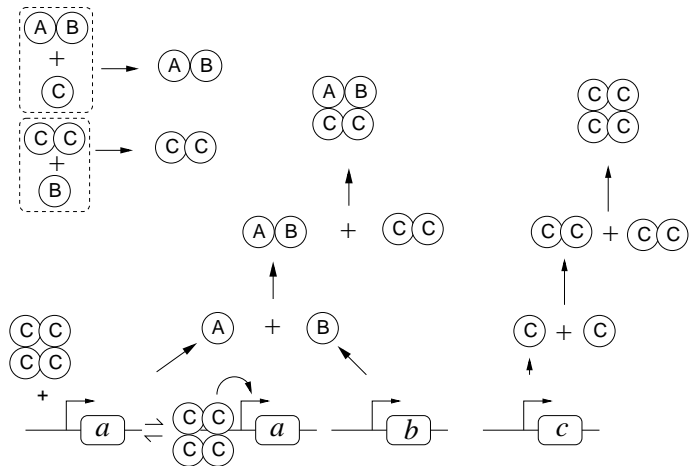

Supplement: pnas_0304532101_21.pdf [file pnas_0304532101_21.pdf]
