# Supplementary material
Source: PubMed Central journal article supplement (PMC327190)

| Reactions                        | Constants |
|----------------------------------|-----------|
| $a \rightarrow a+A$              | 1.2       |
| $A \rightarrow \text{Nothing}$   | 0.000075  |
| $b \rightarrow b+B$              | 2.0       |
| $B \rightarrow \text{Nothing}$   | 0.23      |
| $c \rightarrow c+C$              | 1.2       |
| $C \rightarrow \text{Nothing}$   | 0.0045    |
| $A+B \rightarrow A:B$            | 2.7       |
| $A:B \rightarrow \text{Nothing}$ | 0         |
| $a+B \rightarrow a:B$            | 0.50      |
| $a:B \rightarrow a+B$            | 0.11      |
| $a:B \rightarrow a:B+A$          | 21        |
| $c+B \rightarrow c:B$            | 2.9       |
| $c:B \rightarrow c+B$            | 0.56      |
| $c:B \rightarrow c:B+C$          | 11        |
| $c+A \rightarrow c:A$            | 0.62      |
| $c:A \rightarrow c+A$            | 0.90      |
| $c:A \rightarrow c:A+C$          | 0.85      |
| $A:B+C \rightarrow C$            | 0.47      |
| $A:B+C \rightarrow B$            | 0.99      |
| $A:B \rightarrow B$              | 0.20      |

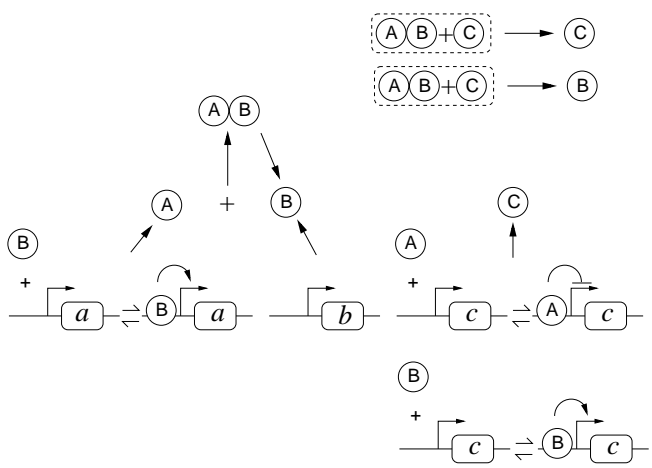

Supplement: pnas_0304532101_23.pdf [file pnas_0304532101_23.pdf]
