# Supplementary material
Source: PubMed Central journal article supplement (PMC327190)

| Reactions                            | Constants |
|--------------------------------------|-----------|
| $a \rightarrow a+A$                  | 1.3       |
| $A \rightarrow \text{Nothing}$       | 0         |
| $b \rightarrow b+B$                  | 0.17      |
| $B \rightarrow \text{Nothing}$       | 0.00017   |
| $A+A \rightarrow A:A$                | 0.012     |
| $A:A \rightarrow \text{Nothing}$     | 0.000047  |
| $A:A+B \rightarrow A:A:B$            | 8.3       |
| $A:A+A:A \rightarrow A:A:A:A$        | 0.23      |
| $A:A:A:A \rightarrow \text{Nothing}$ | 0.00018   |
| $A:A:A:A+A \rightarrow A:A:A:A$      | 15        |
| $A:A:A:A+B \rightarrow A$            | 0.39      |

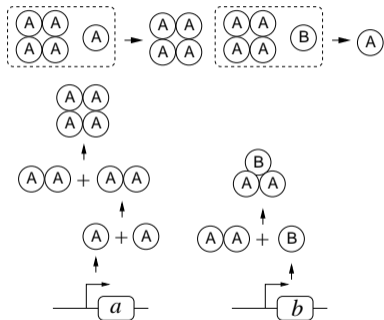

Supplement: pnas_0304532101_25.pdf [file pnas_0304532101_25.pdf]
