# Supplementary material
Source: PubMed Central journal article supplement (PMC327190)

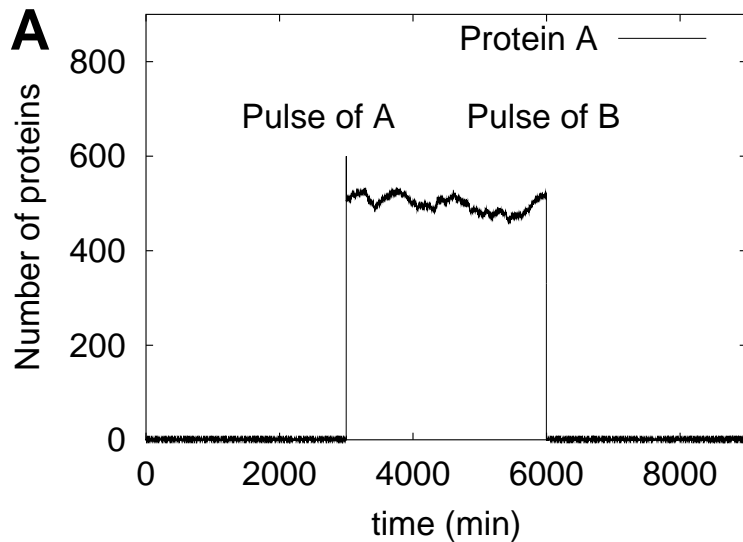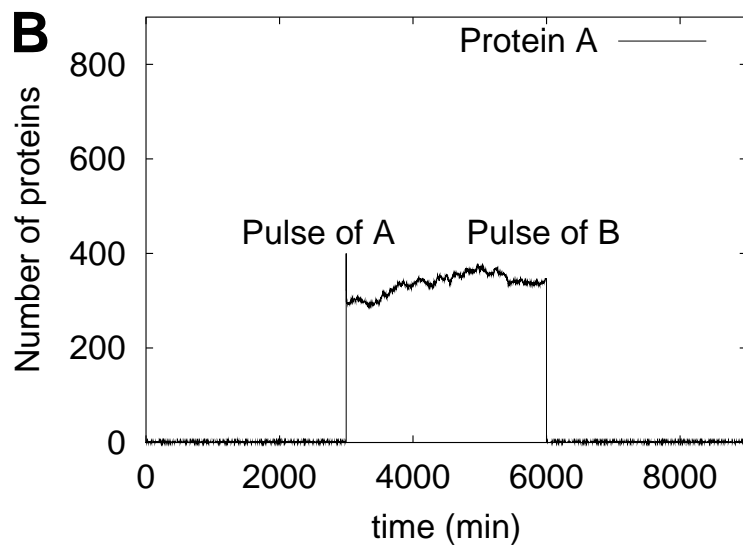

Supplement: pnas_0304532101_17.pdf [file pnas_0304532101_17.pdf]

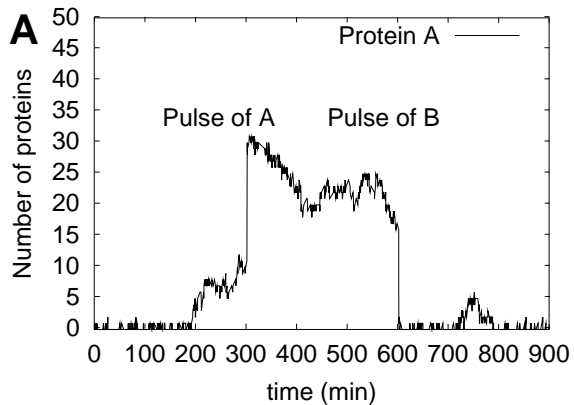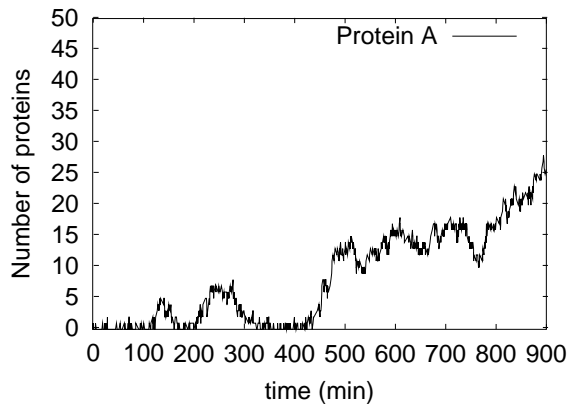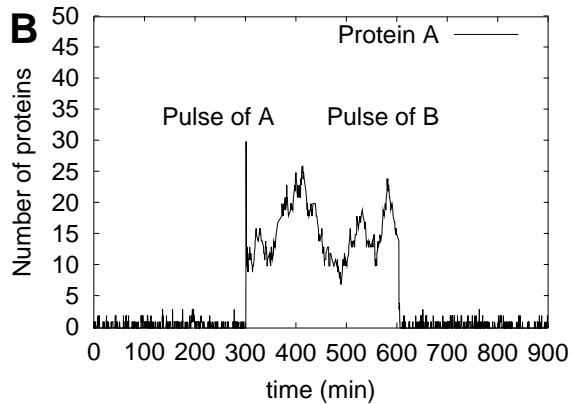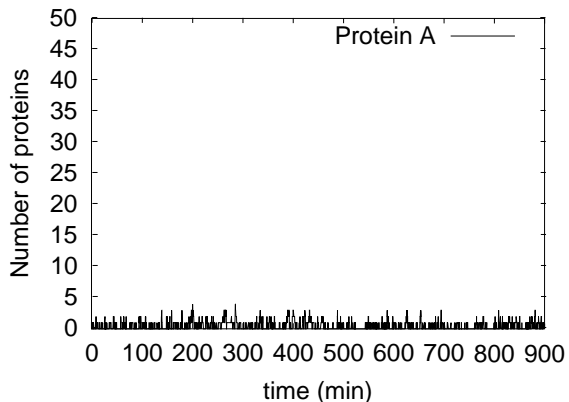

Supplement: pnas_0304532101_19.pdf [file pnas_0304532101_19.pdf]
